# Supplementary material
Source: Springer Nature journal article supplement (https://www.springermedizin.de/resource/supplementary/12887_2013_1220_MOESM2_ESM.pdf/9476748)
Supplement: MOESM2 [file 9476748]

Additional File 2: Distribution of Comorbid Conditions in Study Population

| <b>Comorbid Conditions</b>                                | <b>Compliant Infants (N=2,828)</b> |       | <b>Noncompliant Infants (N=5,615)</b> |       |
|-----------------------------------------------------------|------------------------------------|-------|---------------------------------------|-------|
| Any Congenital Disease (N, %)                             | 1,572                              | 55.6% | 3,164                                 | 56.3% |
| Muscular dystrophy                                        | 1                                  | 0.0%  | 7                                     | 0.1%  |
| Anterior horn cell disease                                | 0                                  | 0.0%  | 0                                     | 0.0%  |
| Intraventricular hemorrhage                               | 397                                | 14.0% | 783                                   | 13.9% |
| Immunodeficiency                                          | 8                                  | 0.3%  | 37                                    | 0.7%  |
| HIV                                                       | 0                                  | 0.0%  | 2                                     | 0.0%  |
| Sickle cell anemia                                        | 16                                 | 0.6%  | 22                                    | 0.4%  |
| Hydrocephalus                                             | 45                                 | 1.6%  | 123                                   | 2.2%  |
| Periventricular leukomalacia                              | 31                                 | 1.1%  | 65                                    | 1.2%  |
| Necrotizing enterocolitis                                 | 131                                | 4.6%  | 356                                   | 6.3%  |
| Trisomy 21                                                | 36                                 | 1.3%  | 116                                   | 2.1%  |
| Cerebral palsy                                            | 14                                 | 0.5%  | 22                                    | 0.4%  |
| Other neuromuscular, immunological and genetic conditions | 237                                | 8.4%  | 590                                   | 10.5% |
| Cystic Fibrosis                                           | 6                                  | 0.2%  | 24                                    | 0.4%  |
| Retinopathy of prematurity                                | 1,085                              | 38.4% | 2,115                                 | 37.7% |
| Failure to thrive                                         | 269                                | 9.5%  | 622                                   | 11.1% |
| CHD                                                       | 195                                | 6.9%  | 606                                   | 10.8% |
| CLDP                                                      | 384                                | 13.6% | 858                                   | 15.3% |
